# Supplementary material for: Peripheral Neuropathy in HIV-infected children attending Care and Treatment Clinic, at Muhimbili National Hospital, Dar es Salaam: A Cross sectional study
Source: Research Square preprint supplement (doi:10.21203/rs.3.rs-149035/v1), 2021-02-10
Supplement: Supplementary file 1 [file 2f8ce22a62ceaa8c8f5ca714.docx]

**TITLE: Peripheral Neuropathy in HIV-infected children attending Care and Treatment Clinic, at Muhimbili National Hospital, Dar es Salaam: A Cross sectional study**

**Authors**: Insiyah Amiji 1, Helga E Naburi 1, Edward Kija 1, Livin P Mumburi 2

**Authors Affiliations**

1. Department of Pediatrics and Child Health, Muhimbili University of Health and Allied Sciences, Dar es Salaam, Tanzania
2. Muhimbili National Hospital, Dar es Salaam, Tanzania

*Corresponding Author:* Dr. Insiyah A Amiji

[insiyah_amijee@hotmail.com](mailto:insiyah_amijee@hotmail.com)

**Supplementary File 1**

**Questionnaire: ENGLISH VERSION**

**Study Title: Peripheral Neuropathy in HIV-infected children attending Care and Treatment Clinic, at Muhimbili National Hospital, Dar es Salaam: A Cross sectional study**

Participant ID no………………………………………..

## **PART A**

## **SOCIODEMOGRAPHIC DATA**

1. AGE………………………………………………………………………….
2. SEX :

□ MALE □ FEMALE

1. CONTACT DETAILS……………………………………………………..
2. A family history of Peripheral neuropathy

□ YES □ NO

**ANTHROPOMETRIC MEASUREMENTS**

1. HEIGHT (M)………………………………………………………………...
2. WEIGHT (KG)………………………………………………………………
3. BMI (kg/m2)………………………………………………………………….

**HIV RELATED INFORMATION**

1. Care and Treatment Clinic file number………………………………………
2. Duration of illness (years)…………………………………………………….
3. Current CD 4 COUNT (last 6 months) ………………………………………

□ ≥ 200 /mm3

□ < 200/mm3

1. Current VIRAL LOAD (last 6 months) ……………………………

- < 1000 copies/ml
- ≥ 1000 copies/ml

1. WHO clinical stage…………………………………………………… ………
2. Is the participant receiving antiretroviral treatment: (if yes go to Qn 15 and 16)

□ YES □ NO

1. Duration of antiretroviral regime………………………………………………

□ < 6 months □ ≥ 6 months

1. Combination of Antiretroviral Treatment used ( ART)…….………………….
2. Opportunistic infections currently on treatment or in the past?

………………………………………………

………………………………………………

………………………………………………

………………………………………………

1. Is the participant receiving Cotrimoxazole prophylaxis as recommended?

□ YES

□ NO

1. Does the participant have history of isoniazid exposure (as part of IPT or treatment for TB in the past 6 months): if yes go to Qn 20

□ Yes

□ No

1. Duration of Isoniazid exposure

□ < 6 months

□ ≥ 6 months

20. Hemoglobin levels in the last visit ( within 6 months) ………………
